# Supplementary material
Source: PubMed Central journal article supplement (PMC7374594)
Supplement: Supp_Data.pdf [file Supp_Data.pdf]

## Supplementary Data

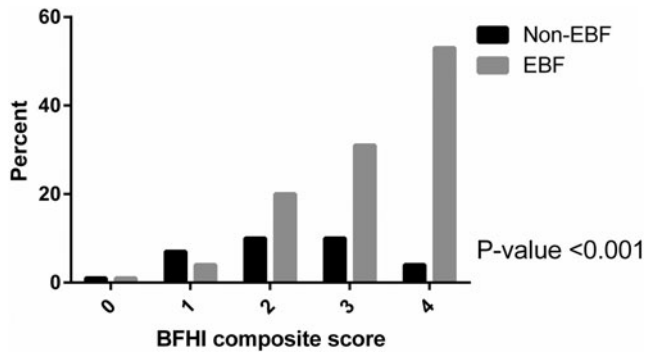

**SUPPLEMENTARY FIG. S1.** Adherence to BFHI by exclusive breastfeeding status. BFHI, Baby-Friendly Hospital Initiative; EBF, exclusive breastfeeding.

**SUPPLEMENTARY TABLE S1. BABY-FRIENDLY HOSPITAL INITIATIVE SCORE BY MATERNAL BODY MASS INDEX AMONG EXCLUSIVE BREASTFEEDING WOMEN**

|   | <i>Total</i><br>(n=109),<br>N (%) | <i>Normal</i><br><i>weight</i> (n=55),<br>N (%) | <i>Overweight</i><br>(n=36),<br>N (%) | <i>Obese</i><br>(n=18),<br>N (%) |
|---|-----------------------------------|-------------------------------------------------|---------------------------------------|----------------------------------|
| 0 | 1 (0.9)                           | 1 (1.8)                                         | 0                                     | 0                                |
| 1 | 4 (3.7)                           | 1 (1.8)                                         | 2 (5.6)                               | 1 (5.6)                          |
| 2 | 20 (18.4)                         | 7 (12.7)                                        | 9 (25.0)                              | 4 (22.2)                         |
| 3 | 31 (28.4)                         | 19 (34.6)                                       | 9 (25.0)                              | 3 (28.4)                         |
| 4 | 53 (48.6)                         | 27 (49.1)                                       | 16 (44.4)                             | 10 (55.6)                        |

$p=0.643$ .

**SUPPLEMENTARY TABLE S2. BABY-FRIENDLY HOSPITAL INITIATIVE SCORE BY MATERNAL BODY MASS INDEX AMONG NONEXCLUSIVE BREASTFEEDING WOMEN**

|   | <i>Total</i><br>(n=32),<br>N (%) | <i>Normal</i><br><i>weight</i> (n=5),<br>N (%) | <i>Overweight</i><br>(n=14),<br>N (%) | <i>Obese</i><br>n=13,<br>N (%) |
|---|----------------------------------|------------------------------------------------|---------------------------------------|--------------------------------|
| 0 | 1 (3.1)                          | 1 (20.0)                                       | 0                                     | 0                              |
| 1 | 7 (21.9)                         | 1 (20.0)                                       | 4 (28.6)                              | 2 (15.4)                       |
| 2 | 10 (31.3)                        | 2 (40.0)                                       | 2 (14.3)                              | 6 (46.2)                       |
| 3 | 10 (31.3)                        | 0                                              | 6 (42.9)                              | 4 (30.8)                       |
| 4 | 4 (12.5)                         | 1 (20.0)                                       | 2 (14.3)                              | 1 (7.7)                        |

$p=0.205$ .
